# Supplementary material for: Seasonal patterns of tuberculosis case notification in the tropics of Africa: A six-year trend analysis in Ethiopia
Source: PubMed Central journal article supplement (PMC6261032; doi:10.1371/journal.pone.0207552), 2018-11-26
Supplement: pone.0207552.s001.pdf [file pone.0207552.s001.pdf]

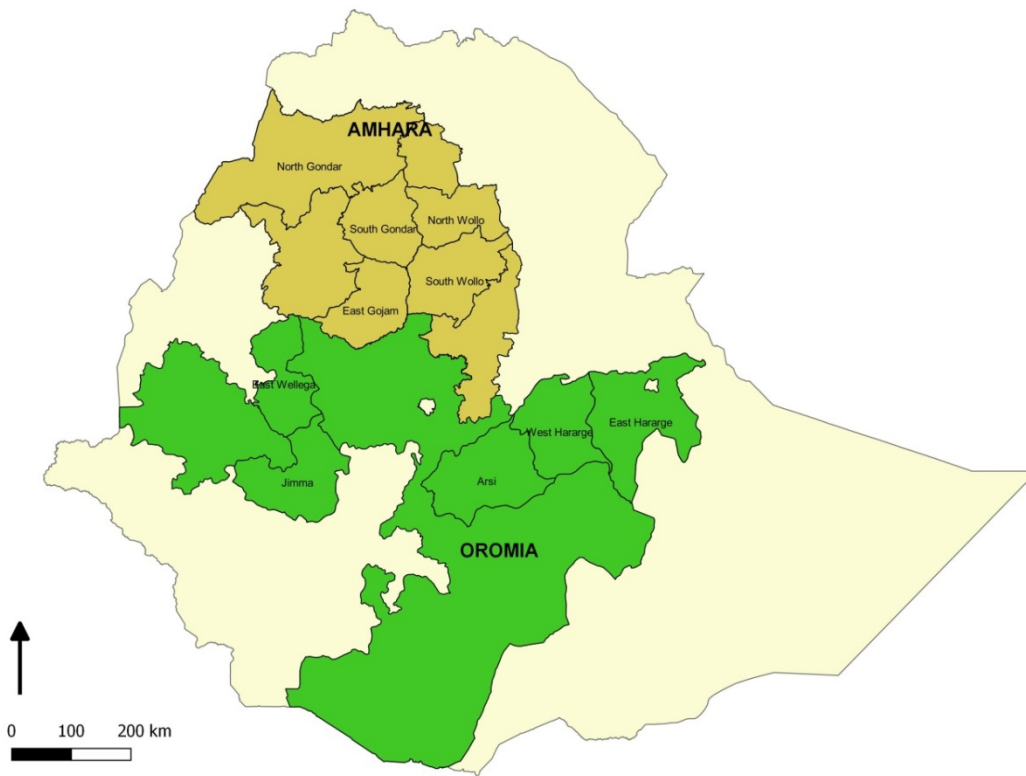

**S1 Fig. Map of the study settings, the 10 zones in Oromia and Amhara in Ethiopia**
