# Supplementary material for: Seasonal patterns of tuberculosis case notification in the tropics of Africa: A six-year trend analysis in Ethiopia
Source: PubMed Central journal article supplement (PMC6261032; doi:10.1371/journal.pone.0207552), 2018-11-26
Supplement: pone.0207552.s002.pdf [file pone.0207552.s002.pdf]

**S 1 Table. Statistical model for the data on notified TB cases**

| Model <sup>a</sup>     | Number of Predictors | Model Fit Statistics | Ljung-Box Q-Test |                        |              | Number of Outliers |
|------------------------|----------------------|----------------------|------------------|------------------------|--------------|--------------------|
|                        |                      | Stationary R-squared | Statistics       | Degree of freedom (DF) | Significance |                    |
| Oromia total-Model_3   | 0                    | 0.665                | 15.769           | 15                     | 0.398        | 0                  |
| Amhara total-Model_2   | 0                    | 0.421                | 18.702           | 15                     | 0.228        | 0                  |
| Total TB cases-Model_1 | 0                    | 0.461                | 18.735           | 15                     | 0.226        | 0                  |
